# Supplementary material
Source: PubMed Central journal article supplement (PMC4889459)

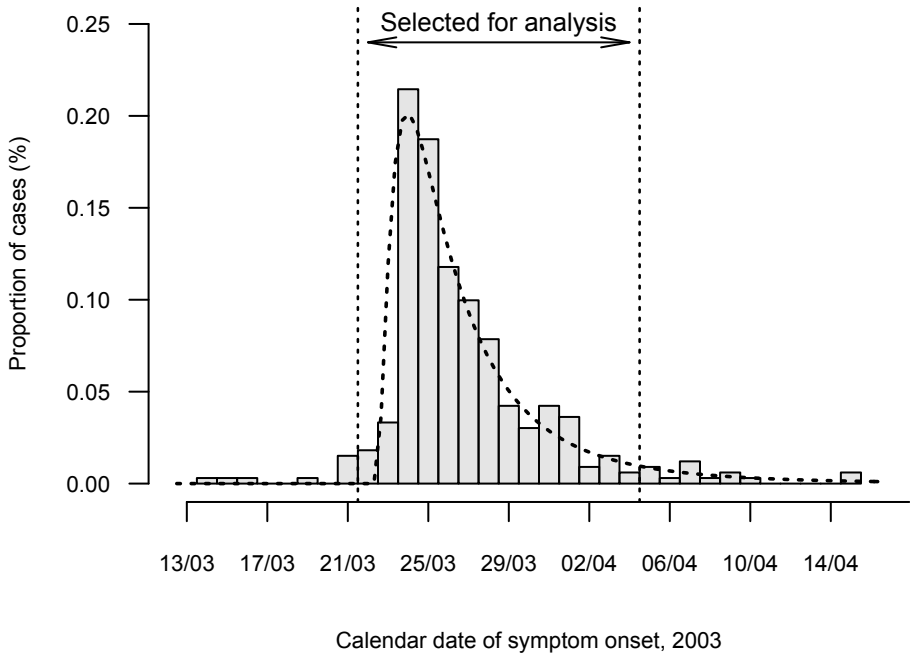

Supplement: NIHMS788747-supplement-Supplemental_Figure_1.pdf [file NIHMS788747-supplement-Supplemental_Figure_1.pdf]
